# Supplementary material for: A molecular phylogeny of Alpine subterranean Trechini (Coleoptera: Carabidae)
Source: PubMed Central journal article supplement (PMC3879191; doi:10.1186/1471-2148-13-248), 2013-11-13

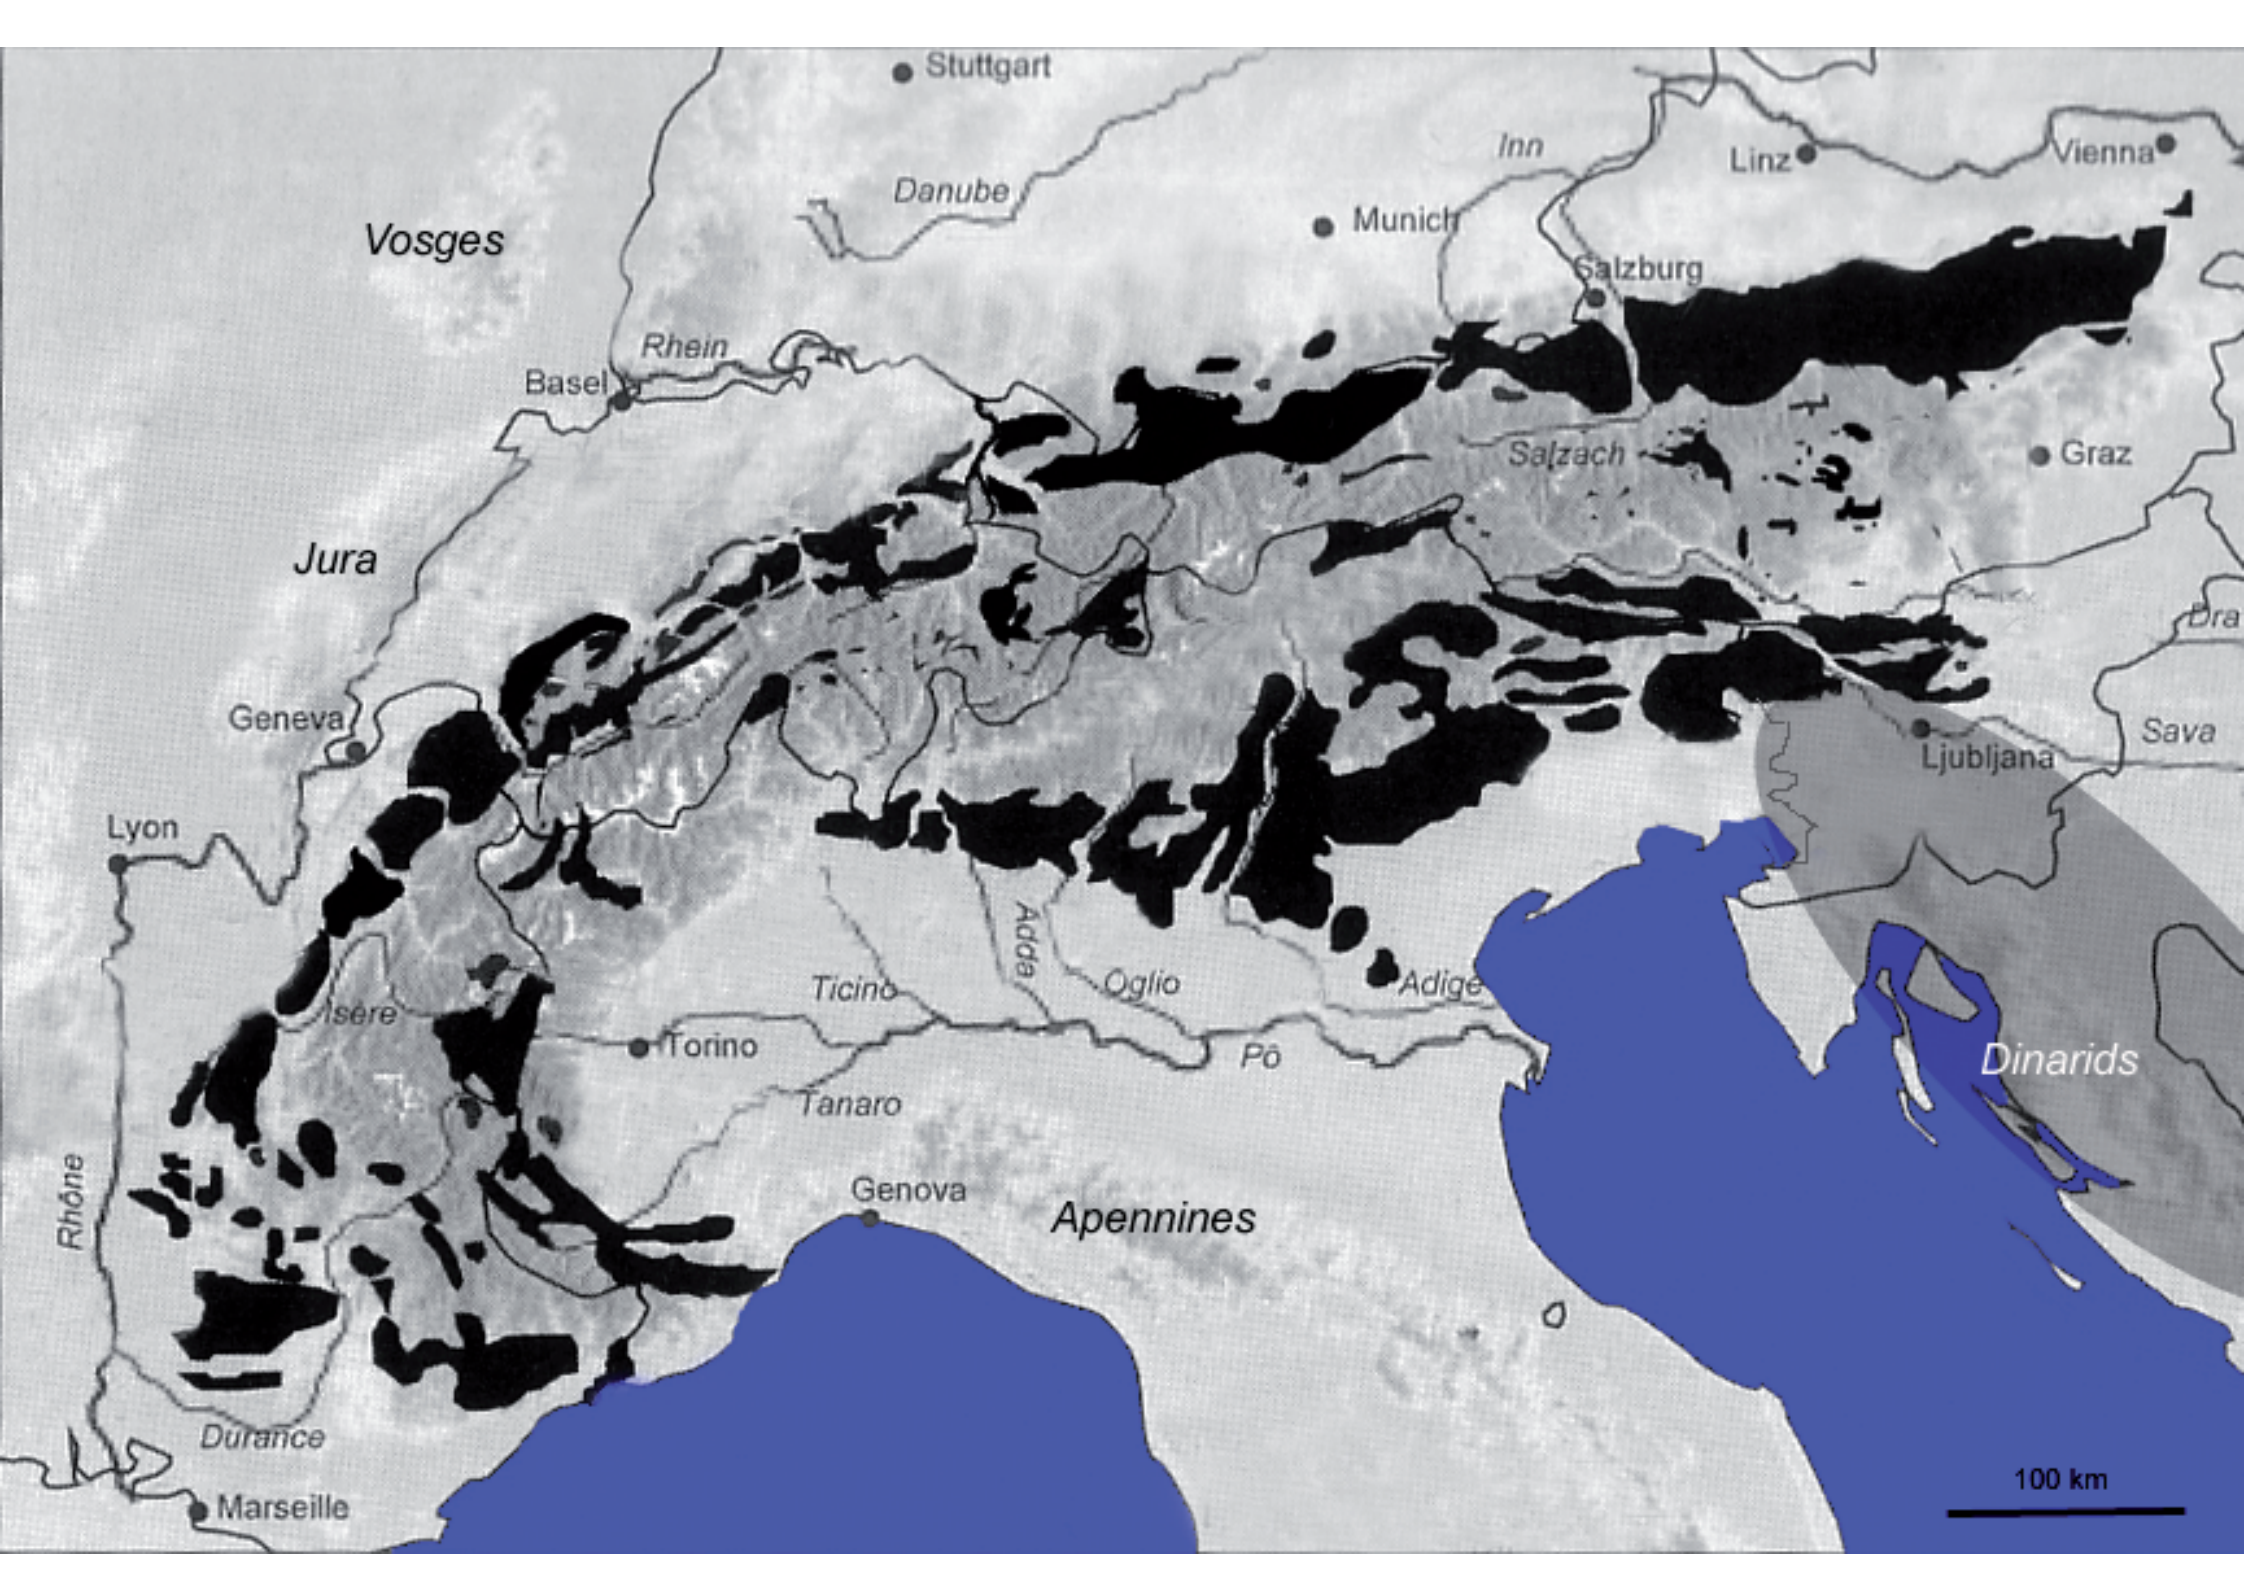

Supplement: 1471-2148-13-248-S1.pdf [file 1471-2148-13-248-S1.pdf]
