# Supplementary material for: A molecular phylogeny of Alpine subterranean Trechini (Coleoptera: Carabidae)
Source: PubMed Central journal article supplement (PMC3879191; doi:10.1186/1471-2148-13-248), 2013-11-13
Supplement: 1471-2148-13-248-S2.pdf [file 1471-2148-13-248-S2.pdf]

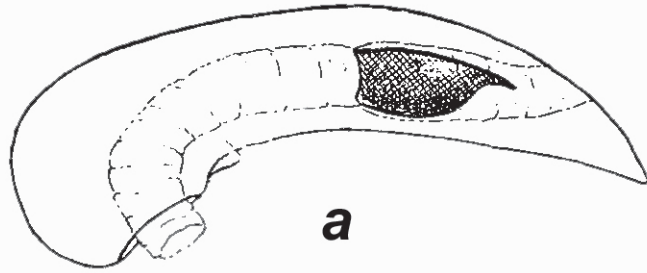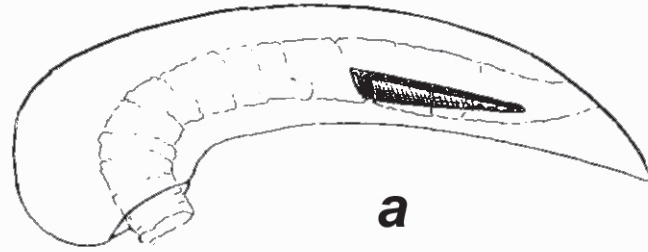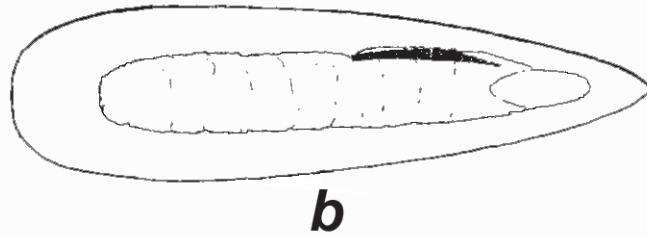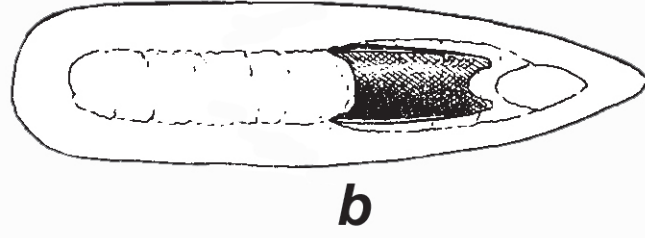

**1**

**2**
