# Supplementary material for: A molecular phylogeny of Alpine subterranean Trechini (Coleoptera: Carabidae)
Source: PubMed Central journal article supplement (PMC3879191; doi:10.1186/1471-2148-13-248), 2013-11-13

## Anisotropic genera

-  *Trechus*
-  *Boldoriella*\*
-  *Allegrettia*\*
-  *Italaphaenops*\*
-  *Orotrechus*\*
-  *Typhlotrechus*\*
-  *Lessinodytes*\*
-  *Doderotrechus*\*

## Isotopic genera

-  *Duvalius*
-  *Agostinia*\*
-  *Luraphaenops*\*
-  *Trichaphaenops*\*
-  *Anophthalmus*\*
-  *Arctaphaenops*\*

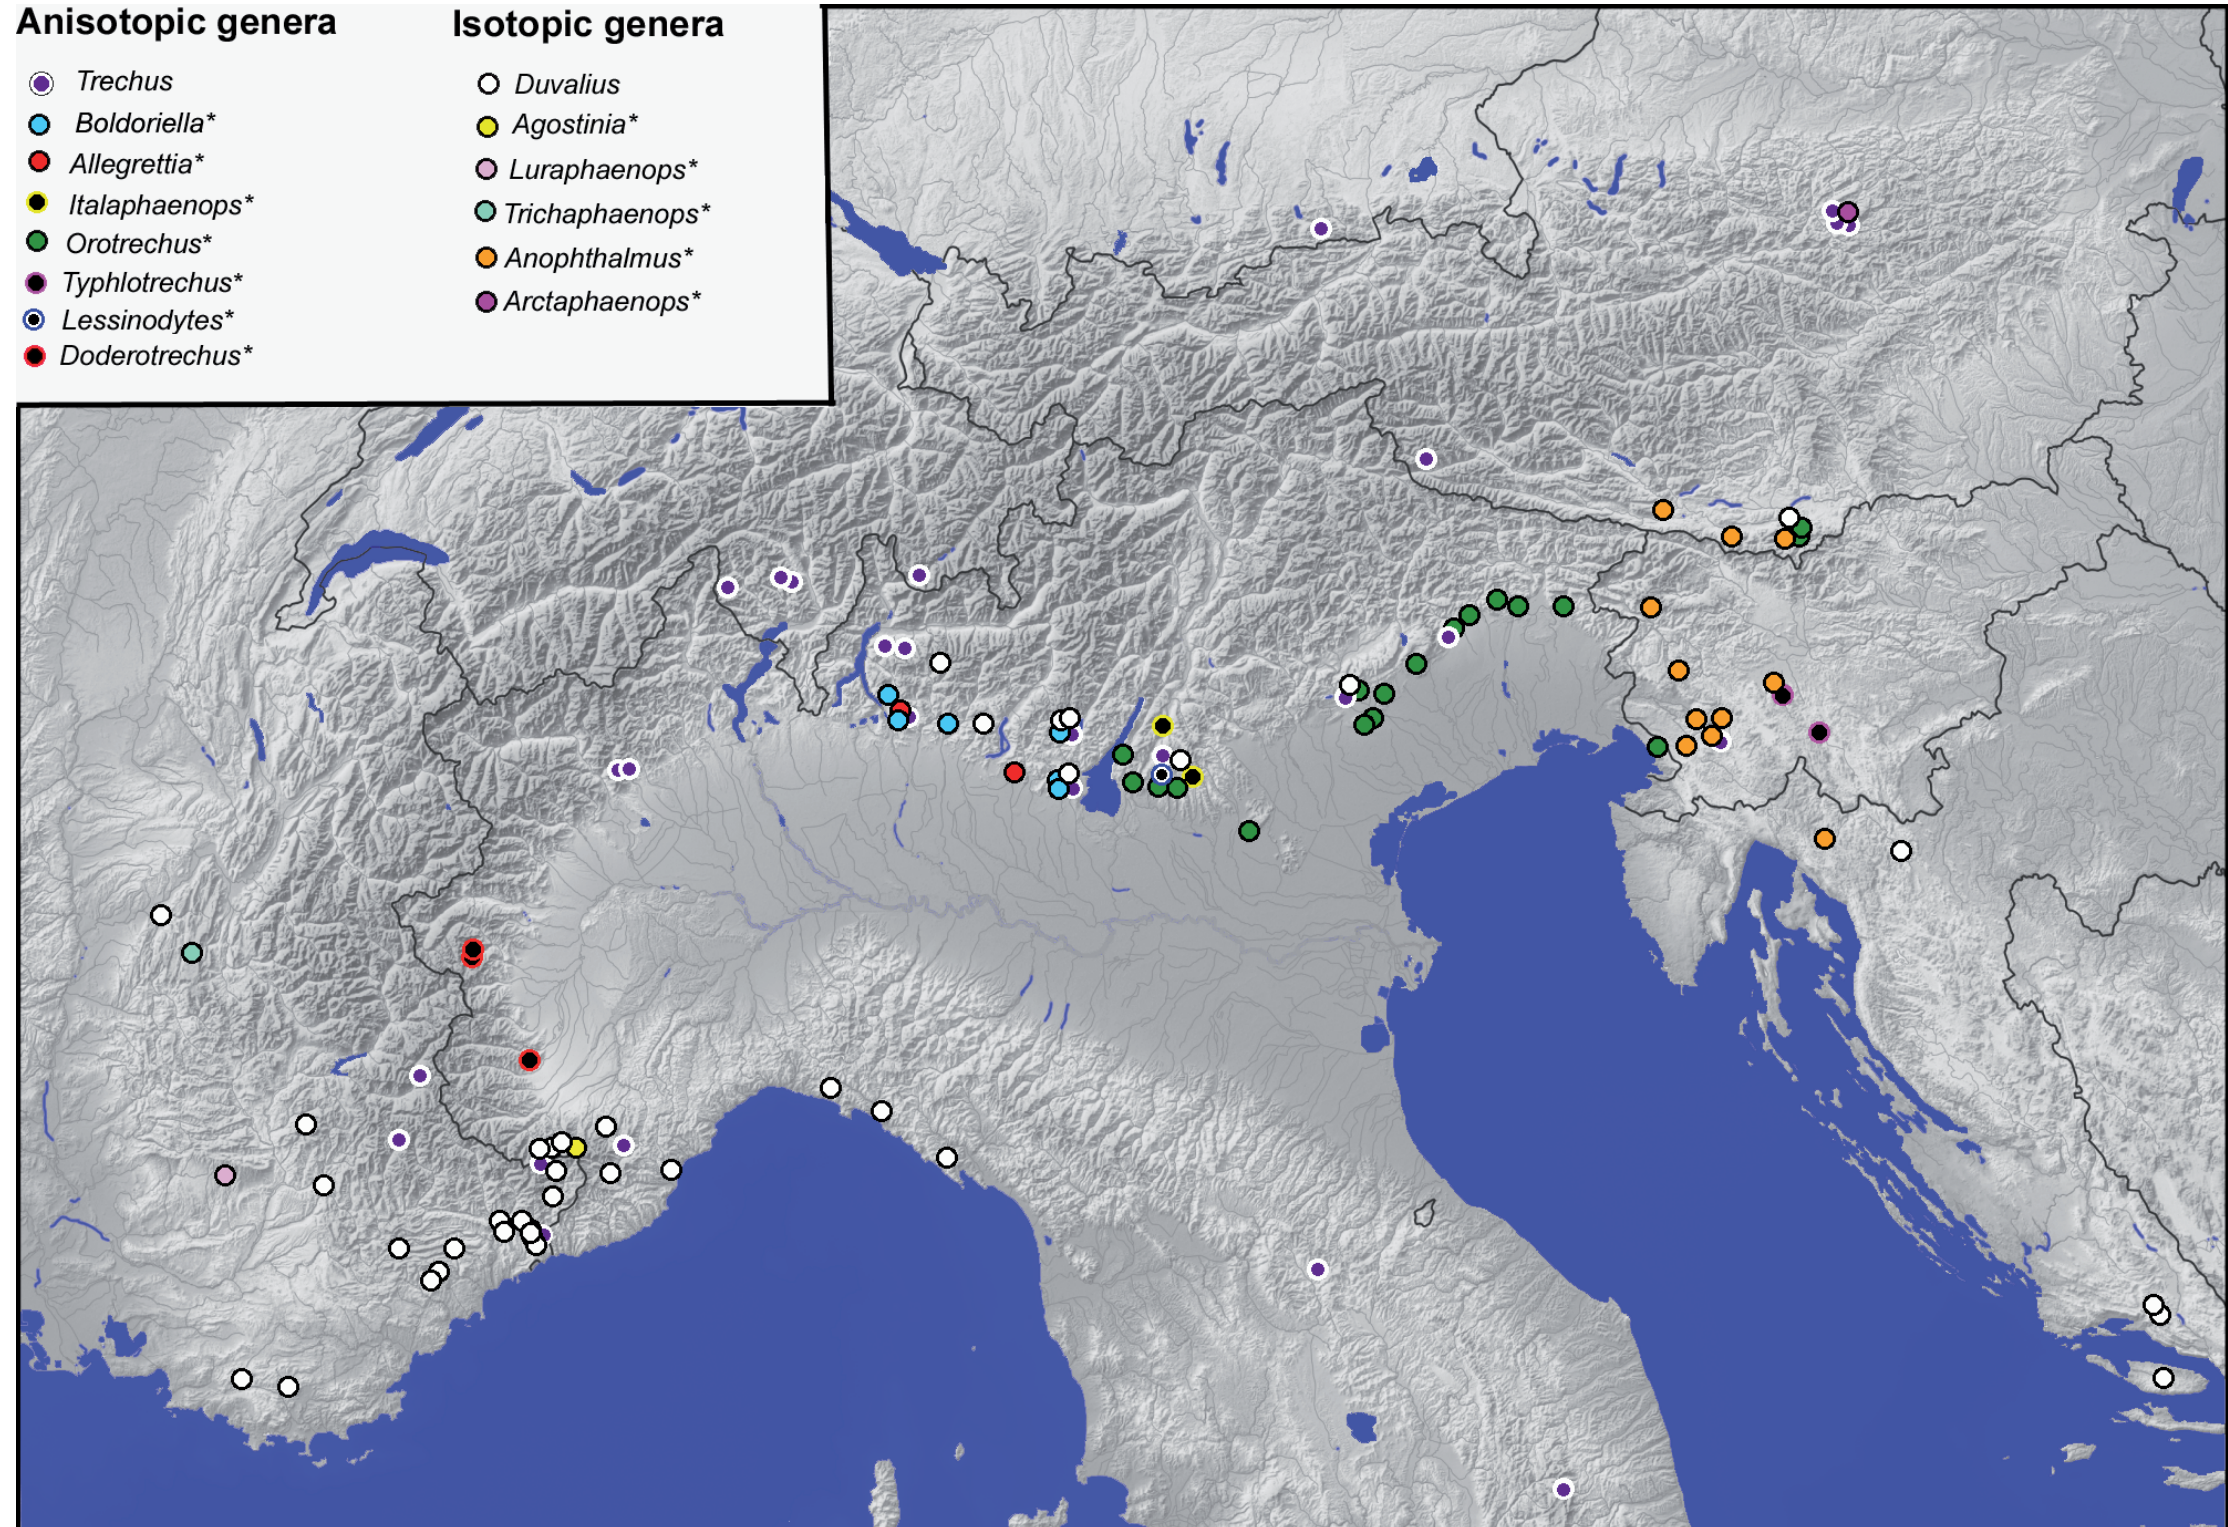

Supplement: 1471-2148-13-248-S4.pdf [file 1471-2148-13-248-S4.pdf]
