# Supplementary material for: A molecular phylogeny of Alpine subterranean Trechini (Coleoptera: Carabidae)
Source: PubMed Central journal article supplement (PMC3879191; doi:10.1186/1471-2148-13-248), 2013-11-13
Supplement: 1471-2148-13-248-S6.pdf [file 1471-2148-13-248-S6.pdf]

**Additional file 6: Table S3.** Primers used in the amplification.

| <b>Gene</b>      | <b>Name</b>  | <b>Sense</b> | <b>Sequence</b>                    | <b>Ref.</b> |
|------------------|--------------|--------------|------------------------------------|-------------|
| <i>cox1</i>      | Jerry (M202) | F            | CAACATTTATTTTGATTTTTTGG            | [1]         |
|                  | Pat (M70)    | R            | TCCA(A)TGCACTAATCTGCCATATTA        | [1]         |
|                  | Chy          | F            | T(A/T)GTAGCCCA(T/C)TTTCATTA(T/C)GT | [2]         |
|                  | Tom          | R            | AC(A/G)TAATGAAA(A/G)TGGGCTAC(T/A)A | [2]         |
|                  | Ron          | F            | GGATCACCTGATATAGCATTCCC            | [1]         |
| <i>rrnL-nad1</i> | 16saR (M14)  | F            | CGCCTGTTTA(A/T)CAAAAACAT           | [1]         |
|                  | ND1A (M223)  | R            | GGTCCCTTACGAATTTGAATATATCCT        | [1]         |
| <i>SSU</i>       | 5'           | F            | GACAACCTGGTTGATCCTGCCAGT           | [3]         |
|                  | b5.0         | R            | TAACCGCAACAACCTTTAAT               | [3]         |
| <i>LSU</i>       | D1           | F            | GGGAGGAAAAGAACTAAC                 | [4]         |
|                  | D3           | R            | GCATAGTTCACCATCTTTC                | [4]         |

**References**

1. Simon C, Frati F, Beckenbach A, Crespi B, Liu H, Flook P: **Evolution, weighting, and phylogenetic utility of mitochondrial gene-sequences and a compilation of conserved polymerase chain-reaction primers.** *Ann Entomol Soc Am* 1994, **87**, 651-701.
2. Ribera I, Fresneda J, Bucur R, Izquierdo A, Vogler AP, Salgado JM, Cieslak A: **Ancient origin of a Western Mediterranean radiation of subterranean beetles.** *BMC Evol Biol* 2010, **10**(29): 1-14. doi:10.1186/1471-2148-10-29
3. Shull VL, Vogler AP, Baker MD, Maddison DR, Hammond PM: **Sequence alignment of 18S ribosomal RNA and the basal relationships of adepagan beetles: evidence for monophyly of aquatic families and the placement of Trachypachidae.** *Systematic Biology* 2001, **50**: 945-969.
4. Ober KA: **Phylogenetic relationships of the carabid subfamily Harpalinae (Coleoptera) based on molecular sequence data.** *Mol Phylogenet Evol* 2002, **24**: 228-248.
